# Supplementary material for: PROMoter uPstream Transcripts share characteristics with mRNAs and are produced upstream of all three major types of mammalian promoters
Source: PubMed Central journal article supplement — Nucleic Acids Res. 2011 May 19;39(16):7179–93. doi: 10.1093/nar/gkr370 (PMC3167610; doi:10.1093/nar/gkr370), 2011-05-19
Supplement: supp_gkr370_Preker_et_al_SOM_NAR-02522-V-2010.pdf [file supp_gkr370_Preker_et_al_SOM_NAR-02522-V-2010.pdf]

Supporting Online Material for:

**PROMoter uPstream Transcripts share characteristics with mRNAs  
and are produced upstream of all three major types of mammalian  
promoters**

Pascal Preker<sup>1</sup>, Kristina Almvig<sup>1</sup>, Marianne S. Christensen<sup>1</sup>, Eivind Valen<sup>2</sup>, Cristophe K.  
Mapendano<sup>1</sup>, Albin Sandelin<sup>2</sup> and Torben Heick Jensen<sup>1,\*</sup>

*<sup>1</sup>Centre for mRNP Biogenesis and Metabolism, Department of Molecular Biology, C.F. Møllers Allé, bldg.  
1130, Aarhus University, 8000 Aarhus, Denmark and <sup>2</sup>The Bioinformatics Centre, Dept. of Biology and the  
Biotech Research and Innovation Centre (BRIC), University of Copenhagen, Ole Maaløes Vej 5, 2200  
Copenhagen, Denmark*

\*corresponding author; email: [thj@mb.au.dk](mailto:thj@mb.au.dk); phone: (+45) 6020 2705; fax: (+45) 8619 6500

This Supporting Material contains:

**Online Material and Methods**

**Four Supplemental Figures**

**Two Supplemental Tables**

## Online Material and Methods

### ChIP assays

For CTD-Ser2P and CTD-Ser5P experiments, phosphatase inhibitors (see main text) were added to the dilution buffer (16.7 mM Tris/HCl pH 8.1, 1.2 mM EDTA, 167 mM NaCl, 0.01% SDS, 1.1% Triton X-100). Antibodies were added to 2 ml of a 10 fold dilution of NCE in dilution buffer and incubated overnight at 4°C on a rotator in the presence of 30  $\mu$ l protein A sepharose CL-4B beads (GE Healthcare), pre-blocked with 1 mg/ml BSA and 0.2 mg/ml salmon sperm DNA. Next day, beads were washed once in each of the following buffers: low-salt wash buffer (20 mM Tris/HCl pH 8.0, 150 mM NaCl, 2 mM EDTA, 0.1% SDS, 1% Triton X-100), high-salt wash buffer (same as low-salt wash buffer but with 500mM NaCl), LiCl wash buffer (10 mM Tris/HCl pH 8.1, 250 mM LiCl, 1mM EDTA, 1% NP-40, 1% natriumdeoxycholat) and twice in TE buffer (10 mM Tris/HCl pH 8.0, 1 mM EDTA). IP'ed complexes were eluted for 30 min at room temperature in 200  $\mu$ l elution buffer (1% SDS, 100 mM NaHCO<sub>3</sub>). Cross-linking was reversed by incubating eluate and input samples at 65°C overnight in elution buffer containing 125 mM NaCl and 25  $\mu$ g of DNase-free RNase A. EDTA and Tris/HCl pH 7.0 were added to final concentrations of 20 and 80 mM, respectively, and samples were treated with 100  $\mu$ g Proteinase K for 3 hr at 45°C. Finally, the DNA was recovered using a QIAquick PCR purification kit (Qiagen). Eluates (100  $\mu$ l in 10 mM Tris/HCl pH 8.5) were diluted four fold with H<sub>2</sub>O. Six  $\mu$ l (1.5%) of each sample were used per qPCR reaction as described above. All samples were analyzed in triplicate, and results are expressed as the mean percent of input after subtraction of background values ("No Antibody Control").

## Supplemental Figure Legends

### Supplemental Figure 1: PROMPTs are enriched in the cell nucleus

- (a) Equal amounts (5  $\mu$ g) of nuclear ('Nuc') or cytoplasmic ('Cyt') RNA from fractionated HeLa cells were resolved on a 1% agarose gel and stained with ethidium bromide. Positions of pre-, 28S- and 18S- ribosomal RNA species as well as DNA marker fragments ('M') are indicated.
- (b) Validation of HeLa nuclear and cytoplasmic fractions. Total and subcellular protein fractions were isolated in parallel with RNA preparations shown in (a) and subjected to western blotting analysis with

antibodies towards a cytoplasmic (tubulin, upper panel) and a nuclear (U1-70K, lower panel) marker protein at dilutions of 1:2,500 and 1:5,000, respectively. The migration of protein size markers (kDa) is indicated.

(c) Nuclear (N) and cytoplasmic (C) fractions were analyzed by RT-PCR (see Figure 1D) for contents of the indicated RNAs. Products of 40 cycles of amplification are visualized on a 2% agarose gel stained with ethidium bromide and DNA size markers indicated on the left.

### **Supplemental Figure 2: 5' RACE analyses of DEPDC5 and SPHK1 PROMPT regions**

See legend to Fig. 3D for details.

### **Supplemental Figure 3: Similar relative levels of CTD-Ser5P in PROMPT and gene regions**

(a) ChIP analysis of the MYC and CCND1 gene and PROMPT regions using an antibody specific for CTD-Ser5P. Values show the mean percent of input recovered in the IP as determined by qPCR. Error bars indicate means of standard deviation of triplicate technical replica of a representative experiment.

### **Supplemental Figure 4: Location of RNAPIII genes near unspliced expressed sequence tags (ESTs) and convergently transcribed RNAPII genes**

(a) RNAPIII PROMPT regions overlapping “orphan” ESTs. UCSC genome browser view of hY5 (upper panel) and SRP (lower panel) RNAPIII-genes and their upstream regions. The locations of amplicons used for RT-qPCR and ChIP analysis in Figs. 4 and 5 are represented by blue boxes above the ESTs (black, labeled by accession numbers). The RNAPIII genes are depicted in brown with an embedded white arrow indicating the direction of transcription. Chromosomal positions (hg18) are on top.

(b) RNAPIII transcripts located in the PROMPT regions of RNAPII genes. UCSC genome browser view of three examples of RNAPIII genes whose transcription originate upstream of, and in antisense orientation to, protein-coding genes (blue tracks). The labeling convention follows (a) except that G/C percentage (black/grey) and vertebrate conservation (green) are shown as separate tracks at the top and bottom, respectively, of each panel.

**A**

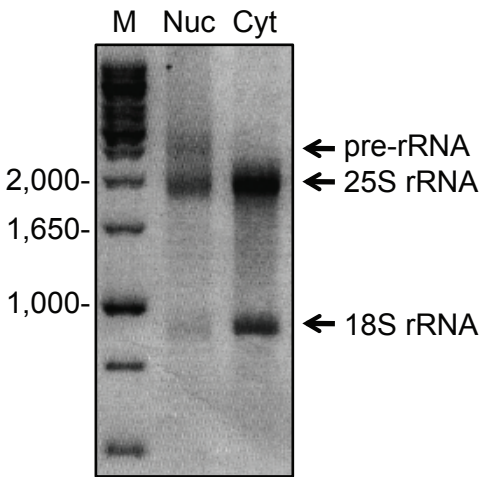

**B**

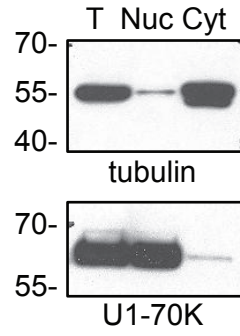

**C**

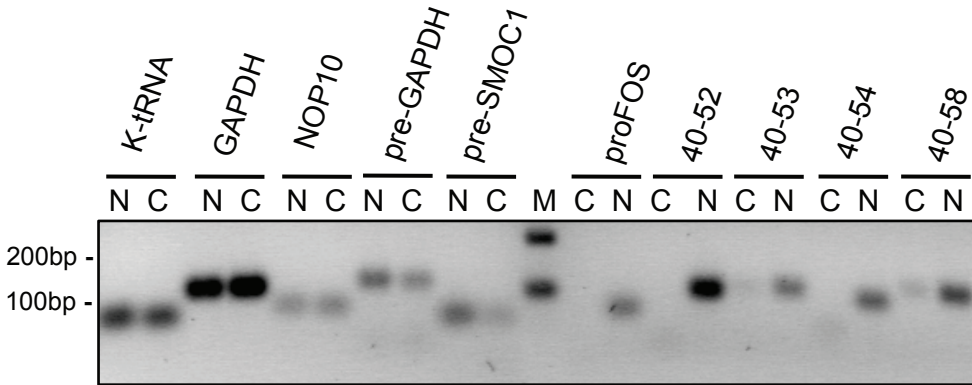

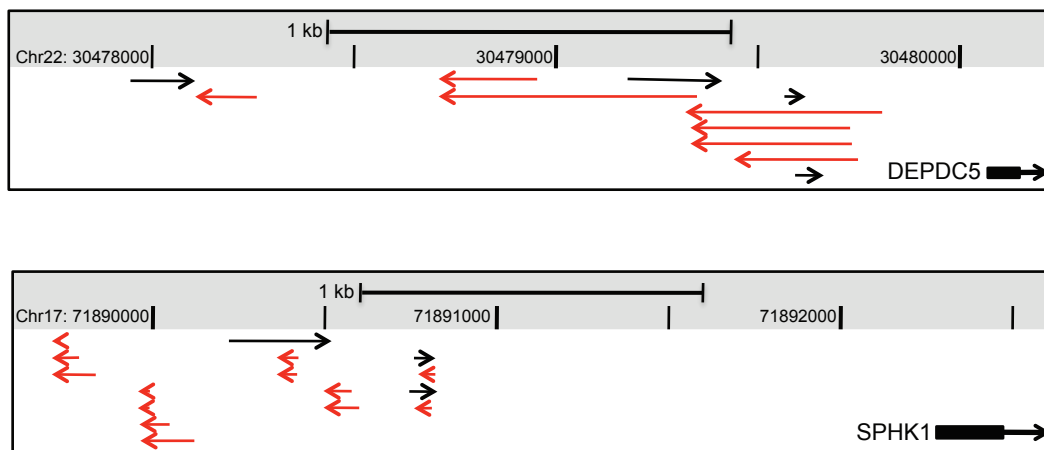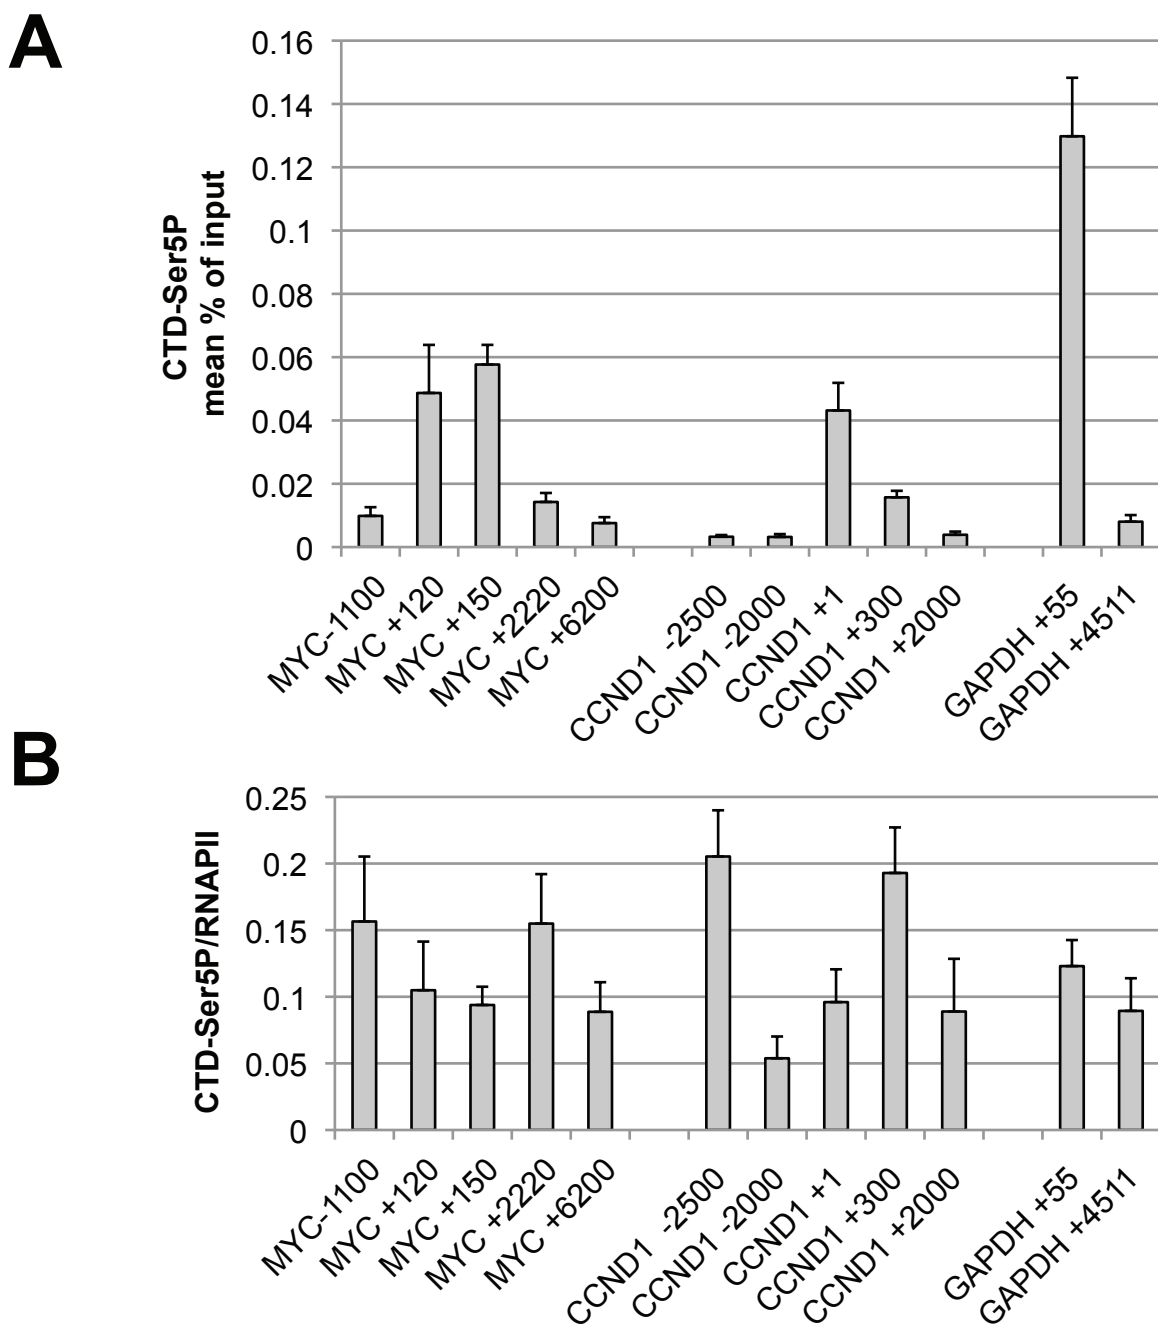

**A**

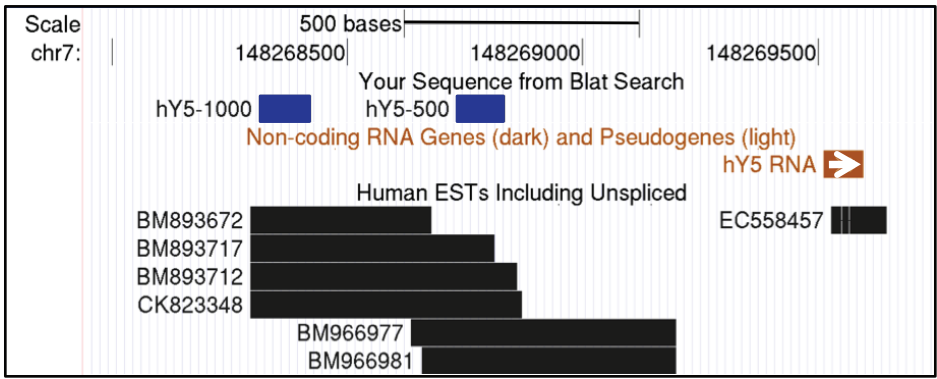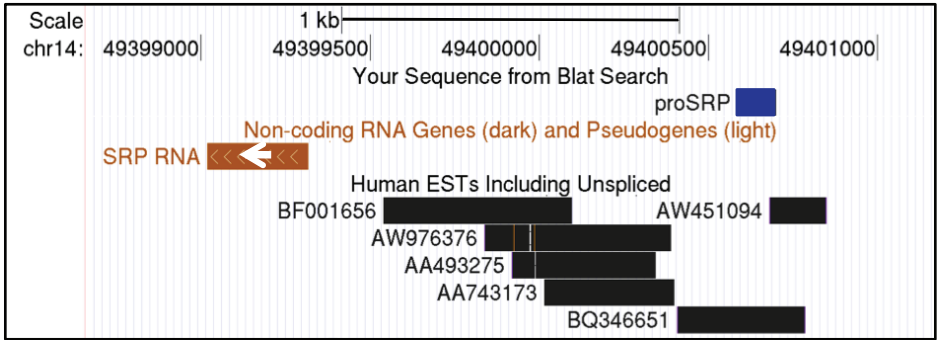

**B**

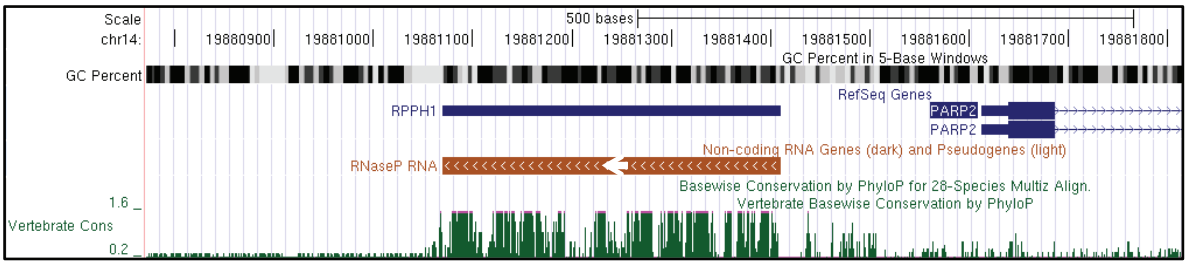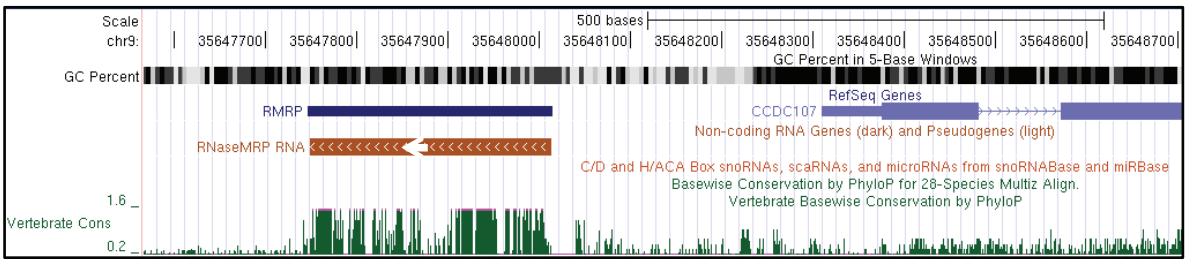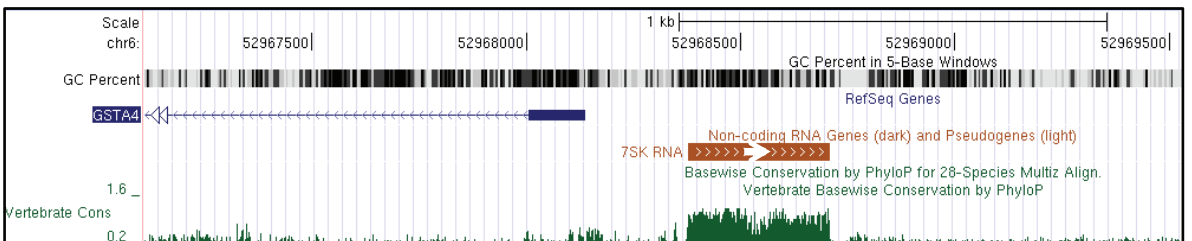

Preker et al., Supplemental Table 1

| <b>target gene</b> | <b>sense siRNA</b>          | <b>antisense siRNA</b>      |
|--------------------|-----------------------------|-----------------------------|
| PAP-alpha          | 5'-gauuaggagugcauacaaatt-3' | 5'-uuuguaugcacuccuaauctt-3' |
| PAP-gamma          | 5'-ggagaaacagaaaggauatt-3'  | 5'-uauuccuuucuguuucuctt-3'  |
| PAPD5              | 5'-gcgugacguccagauauutt-3'  | 5'-aaaucuggacgucagcgctt-3'  |

## Preker et al., Supplemental Table 2

| Primer Pair  | Orientation | Sequence#                      | Sources other than this Study | Alternative Name(s) |
|--------------|-------------|--------------------------------|-------------------------------|---------------------|
| <b>MYC</b>   |             |                                |                               |                     |
| MYC -2350    | left        | AAATCCAGTGTCTTGCTTTC           |                               |                     |
|              | right       | AATTCCAACAAACCCATAAAC          |                               |                     |
| MYC -2140    | left        | CATCTCTTATGCGGTTGAAT           |                               |                     |
|              | right       | AGCCACCTCCTTGTATTCT            |                               |                     |
| MYC -2000    | left        | GCTGGAAACTGTTTTAAGG            |                               |                     |
|              | right       | TACTGGCAGCAGAGATCAT            |                               |                     |
| MYC -1760    | left        | TAAAGCTGAATTGTGCAGTG           |                               |                     |
|              | right       | GCTGTTCAAGATGGGTTATT           |                               |                     |
| MYC -1500    | left        | ATCATTTCAGGGAGCAAAC            |                               |                     |
|              | right       | ACTGTATGTAACCCGCAAAC           |                               |                     |
| MYC -1100    | left        | GTCCACAAGCTCTCCACTT            |                               |                     |
|              | right       | GTGCTAGACGGGAGAATATG           |                               |                     |
| MYC -600     | left        | CAAATGCAATGGGAGTTTAT           | Marianne S. Christensen       | msc33               |
|              | right       | GTTTTCTCCTTATGCCTCT            |                               | msc34               |
| MYC -500     | left        | ATCATTCTAGGCATCGTTTT           |                               |                     |
|              | right       | TGGAGGAAAGAAGGGTATTA           |                               |                     |
| MYC -250     | left        | GGAGCAGCAGAGAAAGGGAGA          | Glover-Cutter et al, 2008     | MYC -400            |
|              | right       | TGAATTAACACGCGCCTA             |                               |                     |
| MYC -200     | left        | GTAGTTAATTCATGCGCTCTTACT       | Glover-Cutter et al, 2008     |                     |
|              | right       | GGCAGCCGAGCACTCTA              |                               |                     |
| MYC +150     | left        | GGAGGGATCGCGCTGAGTA            | Glover-Cutter et al, 2008     | MYC +1              |
|              | right       | TCTGCCTCTCGTGAATTAC            |                               |                     |
| MYC +300     | left        | AGATCCGGAGCGAATAG              |                               |                     |
|              | right       | CTGCTATGGGCAAAGTTT             |                               |                     |
| MYC +1400    | left        | GTTCCAGAACAGCTGCTAC            |                               |                     |
|              | right       | ACTCAATACGGAGATGCAA            |                               |                     |
| MYC +2220    | left        | TGCCCCCAACGTTAGCTTC            | Glover-Cutter et al, 2008     | MYC 2018            |
|              | right       | GGCTGCACCGAGTCGTAGTC           |                               |                     |
| MYC +2300    | left        | TGCAGCCGATTTTCTACT             | Marianne S. Christensen       | msc31               |
|              | right       | GCTCGAATTTCTCCAGATA            |                               | msc32               |
| MYC +5300    | left        | AAGTACATTTTGCTTTTAAAGTTGATT    | Glover-Cutter et al, 2008     | MYC 5155            |
|              | right       | GGCTCAATGATATATTTGCCAGTTATTTTA |                               |                     |
| MYC +6200    | left        | TCCCCATATTAGAGTAGAGGGAA        | Glover-Cutter et al, 2008     | MYC 6028            |
|              | right       | CTTGGCATGTGGATGAGTCT           |                               |                     |
| <b>CCND1</b> |             |                                |                               |                     |
| CCND1 -2500  | left        | CGTGAAGGTGATTTTCAGTTA          |                               |                     |
|              | right       | TCTGTCTTATTTCTTGGTGAC          |                               |                     |
| CCND1 -2300  | left        | TAAAACTGCAACCGAAAAGT           |                               |                     |
|              | right       | GCAGAGAAAGCATTTTGATT           |                               |                     |
| CCND1 -2000  | left        | CCTGGACGGCTCTTTAC              |                               |                     |
|              | right       | GCAGATCTCGACTAGGAAC            |                               |                     |
| CCND1 -1300  | left        | GATGACACTGAACTATATTC           |                               |                     |
|              | right       | TTACAGGTTCTGTCTCTTTG           |                               |                     |
| CCND1 -1000  | left        | GTCCCAGGGCAAATCTA              |                               |                     |
|              | right       | TATTAGTCCCCTCTGCCTGG           |                               |                     |
| CCND1 -650   | left        | TTCGGGCATTTATTTTATTT           |                               |                     |
|              | right       | GGGGTAACCCTAAAAGTT             |                               |                     |
| CCND1 -500   | left        | CTTGGGCATTTGCAAC               |                               |                     |
|              | right       | CACGTGTAATTTGCAAGAAC           |                               |                     |
| CCND1 -160   | left        | GCGATTTGCATTTCTATGA            |                               |                     |
|              | right       | CAAAAGCCATCCCTGAG              |                               |                     |
| CCND1 +1     | left        | GGCTTTGATCTTTGTCTAAC           |                               |                     |
|              | right       | GGAGGCTCCAGGACTTT              |                               |                     |
| CCND1 +300   | left        | GATGCCAACCTCCTCAAC             |                               |                     |
|              | right       | ACCTCCTTCTGCACACATT            |                               |                     |



|             |       |                      |  |  |
|-------------|-------|----------------------|--|--|
| CCND1 +2000 | left  | GCTGGCCATGAACTACC    |  |  |
|             | right | GGATGGTCTCCTTCATCTTA |  |  |
| CCND1 +6950 | left  | TGTGAAGTTCATTTCCAATC |  |  |
|             | right | GTGTGAGGCGGTAGTAGG   |  |  |

|              |       |                       |                      |  |
|--------------|-------|-----------------------|----------------------|--|
| <b>GAPDH</b> |       |                       |                      |  |
| GAPDH +1     | left  | CAAGACCTTGGGCTGGGACTG |                      |  |
|              | right | GATGCGGCTGACTGTCGAAC  |                      |  |
| GAPDH +55    | left  | CTCCTGTTCGACAGTCAGC   | Glover-Cutter et al, |  |
|              | right | TTCAGGCCGTCCTTAGC     | 2008                 |  |
| GAPDH +4511  | left  | AGATGTGTGAGGGTGACTTAT | Glover-Cutter et al, |  |
|              | right | TAGGTCCCAGCTACACGC    | 2008                 |  |
| GAPDH-IVS    | left  | AGCTGCTGACCTTTCTGTAG  |                      |  |
|              | right | TTTTCCAGAAATCAGGAGTG  |                      |  |

|                           |       |                          |             |       |
|---------------------------|-------|--------------------------|-------------|-------|
| <b>Other RNAPII genes</b> |       |                          |             |       |
| IFRG/RPT4                 | left  | GCTCTTTATCTCTCTCAGCAAG   |             |       |
|                           | right | CAGTTTCGGTGTTCGGTTCA     |             |       |
| ID1                       | left  | AGGTAAACGTGCTGCTCTAC     | Marianne S. | msc35 |
|                           | right | TGAAGGTCCCTGATGTATGC     | Christensen | msc36 |
| NOP10                     | left  | TCTCCCCAGATGACAAATAC     |             |       |
|                           | right | CTTGAAGCGTTTCTTGATG      |             |       |
| SMOC-IVS                  | left  | CTGGGTGACAGAGTAAACT      |             |       |
|                           | right | CCACCCTATTTTTGAGACAC     |             |       |
| $\beta$ -glo +1           | left  | ATCGTCGACGAGCTCGTTTAG    |             |       |
|                           | right | CTAGTGAACACAGTTGTGTGTCAG |             |       |
| $\beta$ -glo mRNA         | left  | ACGTGGATGAAGTTGGTGGTG    |             |       |
|                           | right | TCTGATAGGCAGCTGCCTG      |             |       |

|                       |       |                      |                    |            |
|-----------------------|-------|----------------------|--------------------|------------|
| <b>RNAPII PROMPTs</b> |       |                      |                    |            |
| 40-2                  | left  | GGGAGTCTAAGGAAAAGGAG | Preker et al, 2008 | ProSTK11IP |
|                       | right | CAGTGAAAGGAGAGCGTATC |                    |            |
| 40-9                  | left  | GGCATCTGGACTAGAATGAA | Preker et al, 2008 | ProSLC22A5 |
|                       | right | TTGACACCGCCTAATCTTAT |                    |            |
| 40-13                 | left  | GGAAATAGTGAGAAAAGCA  | Preker et al, 2008 | ProRBM39   |
|                       | right | CATTTTTGAAGGAACGGTAG |                    |            |
| 40-33                 | left  | CTGGCCTAGCTAAAGTCTCA | Preker et al, 2008 | ProEXT1    |
|                       | right | TCTGCTCCTAGCTCTCAGTC |                    |            |
| 40-52                 | left  | AGTTCCAAGAAACACACAC  | Preker et al, 2008 | ProPOGZ    |
|                       | right | GGTCGTTTGAGTGGACTAAC |                    |            |
| 40-53                 | left  | AGGGTCAGAGTCCAAGTACA | Preker et al, 2008 | ProCCDC93  |
|                       | right | CTGGGTCGTATATGGAGAAG |                    |            |
| 40-54                 | left  | AAGGCCCTACTTAACCTCTC | Preker et al, 2008 | ProIRF1    |
|                       | right | GAGTTTGGATGGAAAATGA  |                    |            |
| 40-56                 | left  | TACCCTTCGATACACTGTC  | Preker et al, 2008 | ProLACE1   |
|                       | right | GGTACGCACTCAAATGTTTT |                    |            |
| 40-57                 | left  | AGATCCCAGTCATCTGTCAA | Preker et al, 2008 | ProZNF800  |
|                       | right | ATGTCACCAAGAGCAAGAAT |                    |            |
| 40-58                 | left  | TACCCAATTGGCCTAGTAAA | Preker et al, 2008 | ProHMG1    |
|                       | right | CTGCCACTTTAAAGGCTTG  |                    |            |
| 40-61                 | left  | GGAGATACAGACCACGTTTT | Preker et al, 2008 | ProSTAG2   |
|                       | right | GAGAGCGAGCTGATTCCTTA |                    |            |
| 40-64                 | left  | GTCTTGGTCTCCTTTACT   |                    | ProIFNAR1  |
|                       | right | CGATCCTGTGAAGTCAA    |                    |            |
| proFOS                | left  | CTCAGCGCAGATTTGAGT   |                    |            |
|                       | right | GTCAGTTCGGATGACAA    |                    |            |

|                      |       |                      |  |  |
|----------------------|-------|----------------------|--|--|
| <b>RNAPIII genes</b> |       |                      |  |  |
| U6                   | left  | TTCGGCAGCACATATACTAA |  |  |
|                      | right | GCCATGCTAATCTTCTCTGT |  |  |
| hY5                  | left  | CGAGTGTGTGGGTTATG    |  |  |
|                      | right | GGGGAGACAATGTAAATCA  |  |  |

|               |       |                      |  |  |
|---------------|-------|----------------------|--|--|
| SRP_N         | left  | GCCTGTAGTCCCAGCTACT  |  |  |
|               | right | ACCATATTGATGCCGAACT  |  |  |
| SRP_C         | left  | GTGAATAGCCACTGCACCTC |  |  |
|               | right | GTCTCGCTATGTTGCTCAG  |  |  |
| U6atac (chr9) | left  | CAACACGCATACGGTTAAG  |  |  |
|               | right | TTAGATGCCACGAAGTAGGT |  |  |
| F-tRNA        | left  | GGAGAGCGTTAGACTGAAGA |  |  |
|               | right | ATTGAACCAGGGACCTTTA  |  |  |
| K-tRNA        | left  | GGATAGCTCAGTCGGTAGAG |  |  |
|               | right | CTGGACCCTCAGATTAAGT  |  |  |

| <b>RNAPIII and RNAPI PROMPTS</b> |       |                       |                  |       |
|----------------------------------|-------|-----------------------|------------------|-------|
| proU6 -630 (chr15)               | left  | TCCACCACTACTGGAAGTTT  |                  |       |
|                                  | right | TTCTCGGAACTAGCTCTCTG  |                  |       |
| proU6 -1140 (chr15)              | left  | ATCAATGACAGCTCCAATGT  |                  |       |
|                                  | right | TGTGAAAGTGTGGCATAGAA  |                  |       |
| prohY5 -500 (chr7)               | left  | TTTAAACTGCCGAAGAACTC  |                  |       |
|                                  | right | CCCCATAAGTCTACCCTCTT  |                  |       |
| prohY5 -1000 (chr7)              | left  | TGCCTAAGTGCAGAAAATCT  |                  |       |
|                                  | right | TTTGGAAATATCAGCCTCATC |                  |       |
| proSRP (chr14)                   | left  | AAGAACCAGGGAGAAGA AAC |                  |       |
|                                  | right | CTCCTAATTGGCAGGTCTAA  |                  |       |
| proU6atac (chr9)                 | left  | AAGGACCTGCCTTAACCTAC  |                  |       |
|                                  | right | TTGTGTGTGTTTCCAGTTGT  |                  |       |
| proE-tRNA-CTC (chr18)            | left  | TAGGCCAACGCTGTTATAGT  |                  |       |
|                                  | right | CTTCTTGAGTTGGAAACTG   |                  |       |
| proK-tRNA-TTT (chr6)             | left  | TCCCCACCAGATTAGTTAGA  |                  |       |
|                                  | right | GCACCAATCGACACTGTAT   |                  |       |
| proV-tRNA-TAC (chrX)             | left  | AAGATGGGCATAACATTGAG  |                  |       |
|                                  | right | TCACCTCTGGTCTCAGTCTC  |                  |       |
| proHVG-1 (chr5)                  | left  | ACGCCTGTAATCCCAATAC   |                  |       |
|                                  | right | GGATACTCTCGGTCTCTTGA  |                  |       |
| pro-rDNA                         | left  | GTTTTGGGCACCGTTTGTG   | Sinkkonen et al, | 42 kb |
|                                  | right | GCGAAACCGTGAGTCGAGAA  | 2010*            |       |

| <b><i>S. cerevisiae</i> TOM1</b> |       |                       |  |  |
|----------------------------------|-------|-----------------------|--|--|
| TOM1 -930                        | left  | TCCAAGGATGTTCTTCTGAG  |  |  |
|                                  | right | GCTTCATAGGGTCTGGTATG  |  |  |
| TOM1 -1470                       | left  | GCGTTGGTTGATTACTCATT  |  |  |
|                                  | right | CTCAGAAGCAGCCATAAGTT  |  |  |
| TOM1 -1920                       | left  | TTGGTTTCTTGGCTACTGTT  |  |  |
|                                  | right | GGCTTTTATAATCGTTCAAT  |  |  |
| TOM1 -2130                       | left  | TCTTCGCCAACTACTTGGATT |  |  |
|                                  | right | CGTGATAACTGACGGAAGA   |  |  |
| TOM1 -2700                       | left  | ATGATGAAGAAATGGCAGAC  |  |  |
|                                  | right | AGCGTCATCTTCATTTTCAC  |  |  |
| TOM1 -3030                       | left  | GCAAGGTGAGAGTGAAGAAG  |  |  |
|                                  | right | AATGGGTACGATTGATTGAG  |  |  |

| <b>Oligonucleotides to confirm KDs</b> |       |                      |  |  |
|----------------------------------------|-------|----------------------|--|--|
| PAP-alpha                              | left  | CAACAGAACTCCACGTACAA |  |  |
|                                        | right | GACCACTCTGCCTTACTCAG |  |  |
| PAP-gamma                              | left  | ATCCGTGTCATCAAAAATTC |  |  |
|                                        | right | AAACAAGTGGCTGCATCTAT |  |  |
| PAPD5                                  | left  | CAGCTGACCTCATCAAAGAT |  |  |
|                                        | right | GAACCAATCCACCTGTAAA  |  |  |

# Oligonucleotide sequences used for quantitative PCR are shown in the 5' to 3' direction.

\* Sinkkonen, L., Hugenschmidt, T., Filipowicz, W. and Svoboda, P. (2010) Dicer is associated with ribosomal DNA chromatin in mammalian cells. *PLoS One*, **8**, e12175.
